# Supplementary material
Source: PubMed Central journal article supplement (PMC4194115)
Supplement: embj0033-0921-sd3.pdf [file embj0033-0921-sd3.pdf]

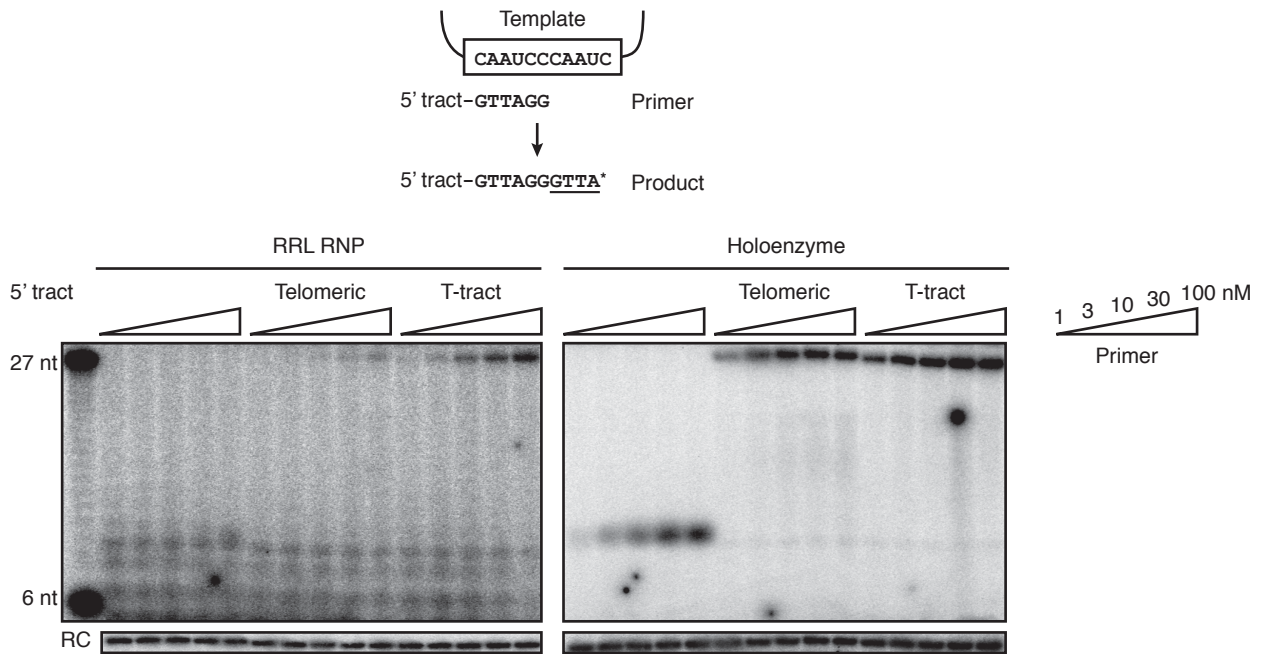

**Supplementary Figure S3.** Enhancement of primer use by a 5' region of single-stranded DNA does not depend on single-stranded DNA sequence. At top, schematic of elongation of the DNA primers. Nucleotides added by primer extension are underlined, with an asterisk denoting ddATP addition. At bottom, activity of full-length TERT RNPs reconstituted either in RRL with hTRmin or in 293T cells with full-length hTR, each assayed with the indicated final concentrations of the minimal 6 nt primer GTTAGG (no 5' extension) or primers 5'-extended with telomeric-repeat sequence [primer AGG(GTTAGG)<sub>4</sub>] or T-tract sequence (primer T<sub>21</sub>-GTTAGG). Note that a lower concentration of the longer primers is sufficient for maximal product synthesis, and that product synthesis is comparable or better with the 5' T-tract versus telomeric-repeat extension.
