# Supplementary material
Source: PubMed Central journal article supplement (PMC4194115)
Supplement: embj0033-0921-sd4.pdf [file embj0033-0921-sd4.pdf]

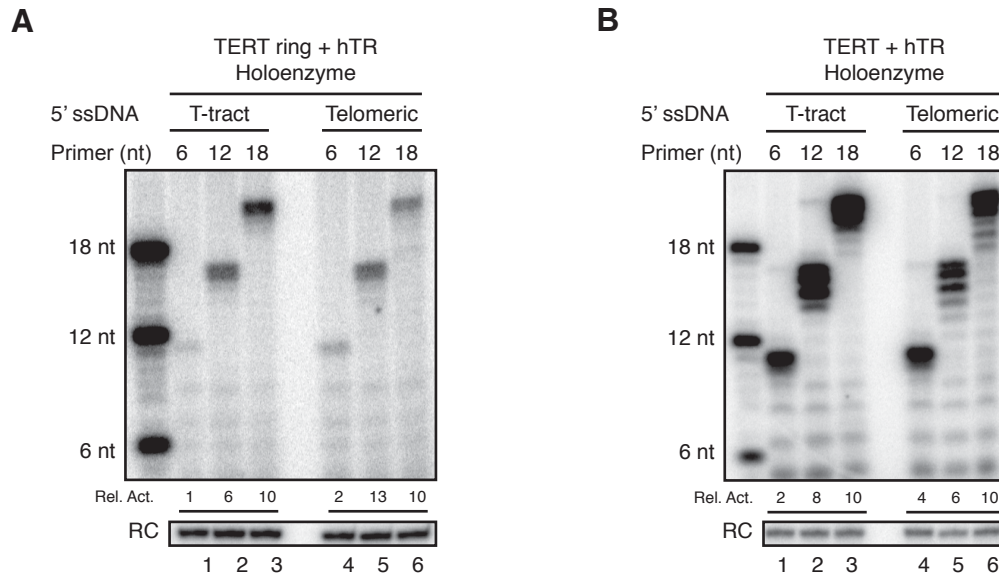

**Supplementary Figure S4.** Primer single-stranded DNA stimulates the activity of TERT ring or full-length TERT assembled as telomerase holoenzyme. (**A**, **B**) Activity of TERT ring holoenzyme RNP (**A**) or full-length TERT holoenzyme RNP (**B**) reconstituted in 293T cells with full-length hTR and assayed with 6 nt, 12 nt or 18 nt primers. The 5' single-stranded DNA extensions were either T-tract ( $T_n$  with  $n = 6$  or  $12$ ) or telomeric-repeat  $[(GTTAGG)_n]$  with  $n = 1$  or  $2$ ] sequence. For relative activity (Rel. Act.), product intensities were first subtracted for background signal then normalized to activity on the 18 nt primer within each set of assays.
