# Supplementary material
Source: PubMed Central journal article supplement (PMC4194115)
Supplement: embj0033-0921-sd5.pdf [file embj0033-0921-sd5.pdf]

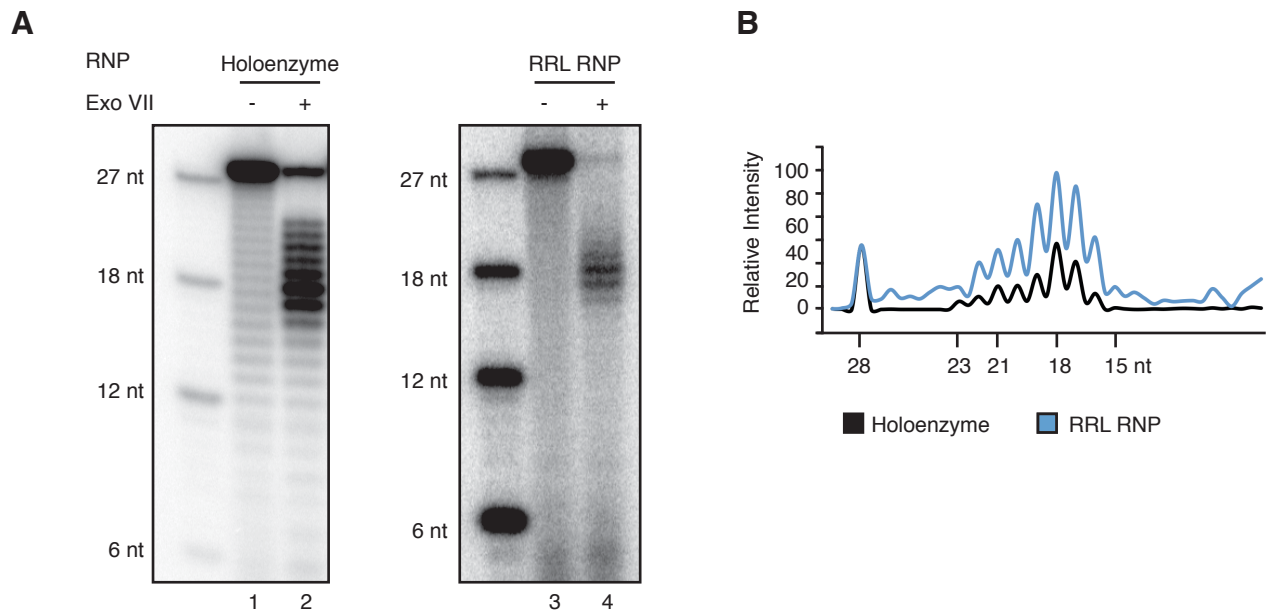

**Supplementary Figure S5.** ExoVII protection of product DNA is similar for holoenzyme and RRL-reconstituted RNPs. **(A)** ExoVII protection of  $\alpha$ -<sup>32</sup>P dGTP-extended T<sub>21</sub>-GTTAGG by immunopurified full-length TERT reconstituted in 293T cells with full-length hTR (lanes 1 and 2) or immunopurified full-length TERT RNP reconstituted in RRL with hTRmin (lanes 3 and 4). Unextended 5' end-labeled 6, 12, 18 and 27 nt oligonucleotides are shown as size markers. **(B)** Product length profiles of ExoVII protection by holoenzyme RNP or RRL-reconstituted RNP from gel lanes in **(A)**.
