# Supplementary material
Source: PubMed Central journal article supplement (PMC4194115)
Supplement: embj0033-0921-sd6.pdf [file embj0033-0921-sd6.pdf]

Wu & Collins  
Supplementary Figure S6

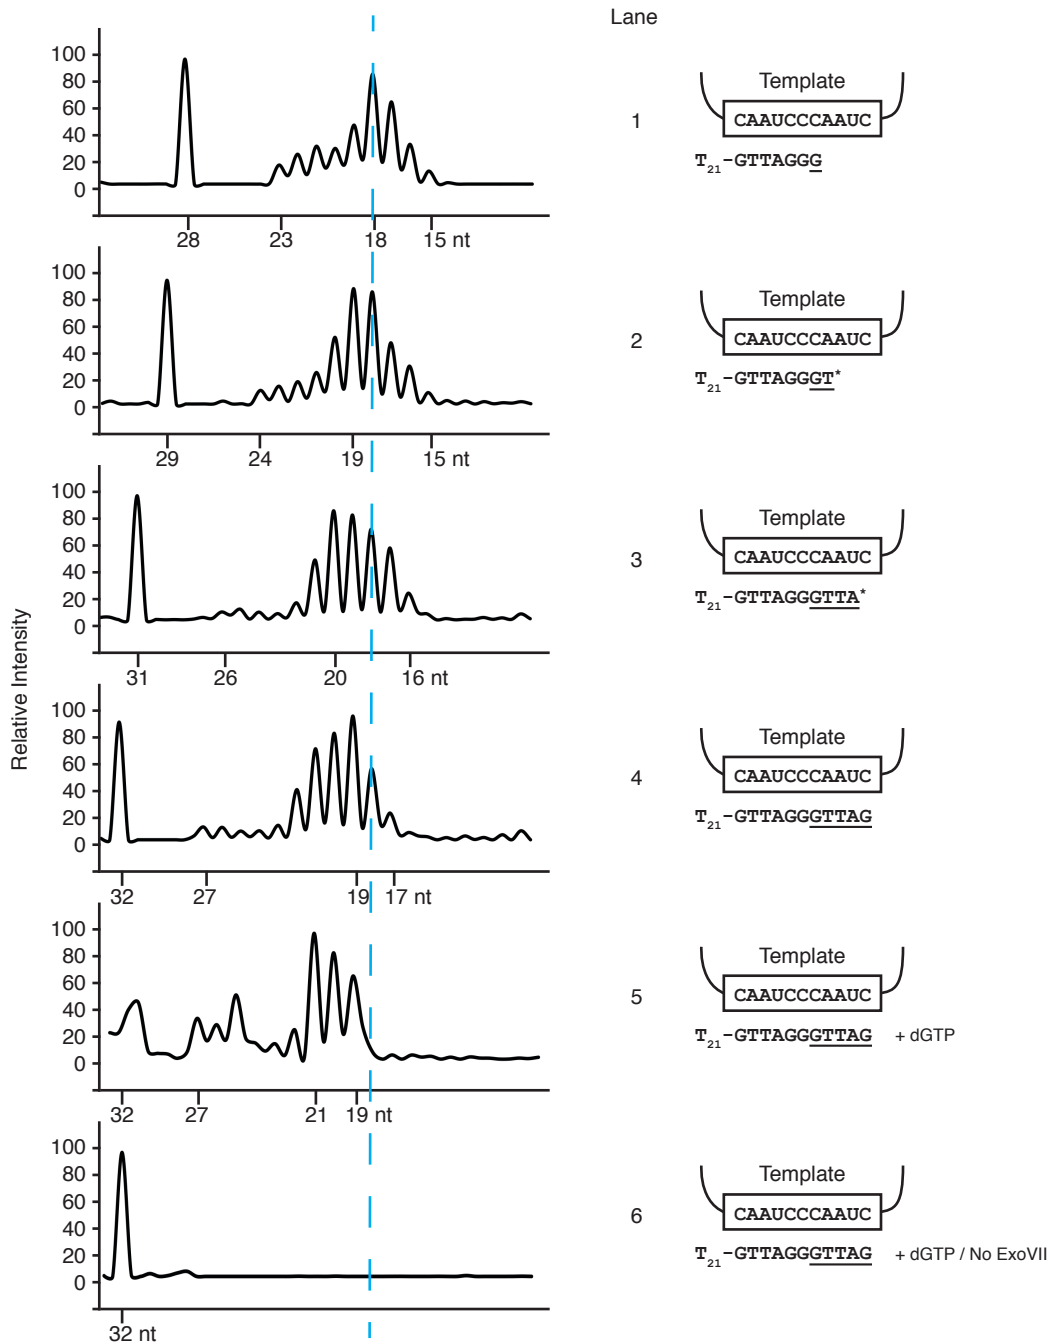

**Supplementary Figure S6.** The length of product DNA protected from ExoVII increases with synthesis across the template. Protected products of the full-length TERT RNP are shown from Figure 7A. At right, schematics of primer elongation prior to ExoVII treatment. Nucleotides added by primer extension are underlined, with an asterisk denoting a ddNTP. For ease of comparison, the predominant 18 nt length of protection after addition of a single radiolabeled dGTP is marked by the dashed blue line.
