# Supplementary material
Source: PubMed Central journal article supplement (PMC4194115)
Supplement: embj0033-0921-sd7.pdf [file embj0033-0921-sd7.pdf]

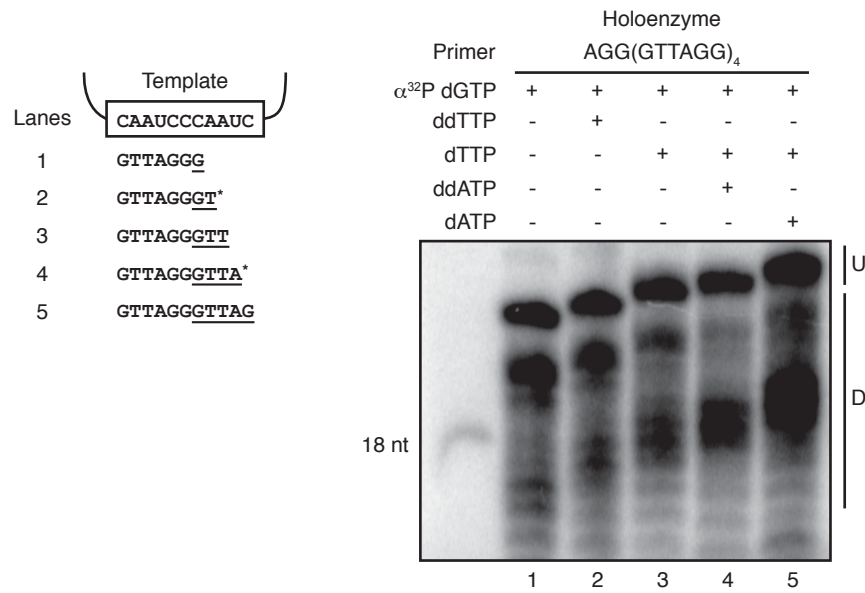

**Supplementary Figure S7.** ExoVII protects telomeric-repeat sequence DNA. At left, schematic of elongation of the primer 3' end prior to ExoVII treatment. Nucleotides added by primer extension are underlined, with asterisks denoting a ddNTP. At right, ExoVII protection assay using the primer AGG(GTTAGG)<sub>4</sub> elongated by immunopurified full-length TERT RNP reconstituted in 293T cells with wild-type hTR. Undigested products (U) and ExoVII-digested products (D) are indicated. Unextended 5' end-labeled 18 nt oligonucleotide was run as a size marker.
